# Supplementary material for: NT-proBNP levels, atherosclerosis and vascular function in asymptomatic type 2 diabetic patients with microalbuminuria: peripheral reactive hyperaemia index but not NT-proBNP is an independent predictor of coronary atherosclerosis
Source: Springer Nature journal article supplement (doi:10.1186/1475-2840-10-71), 2011-01-01
Supplement: 12933_2011_384_MOESM1_ESM.pdf [file 12933_2011_384_MOESM1_ESM.pdf]

**Coronary calcium  
score >400**

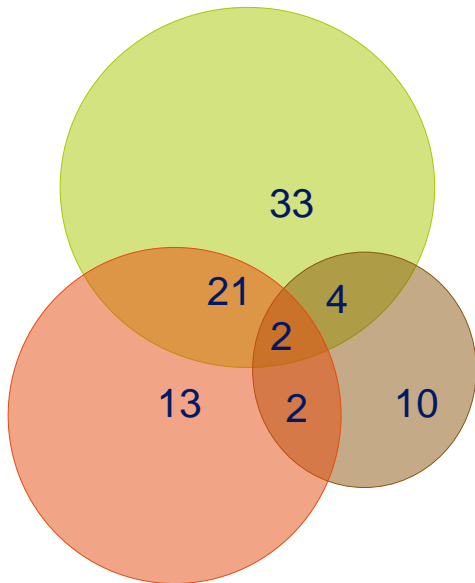

**Ankle-brachial  
Index <0.90 and/or toe-  
brachial Index <0.64**

**Carotid intima-media  
thickness >0.90 mm**
